# Supplementary material for: H2S-releasing nanoemulsions: a new formulation to inhibit tumor cells proliferation and improve tissue repair
Source: PubMed Central journal article supplement (PMC5356665; doi:10.18632/oncotarget.12609), 2016-10-12
Supplement: oncotarget-07-84338-s001.pdf [file oncotarget-07-84338-s001.pdf]

## H<sub>2</sub>S-releasing nanoemulsions: a new formulation to inhibit tumor cells proliferation and improve tissue repair

### Supplementary Materials

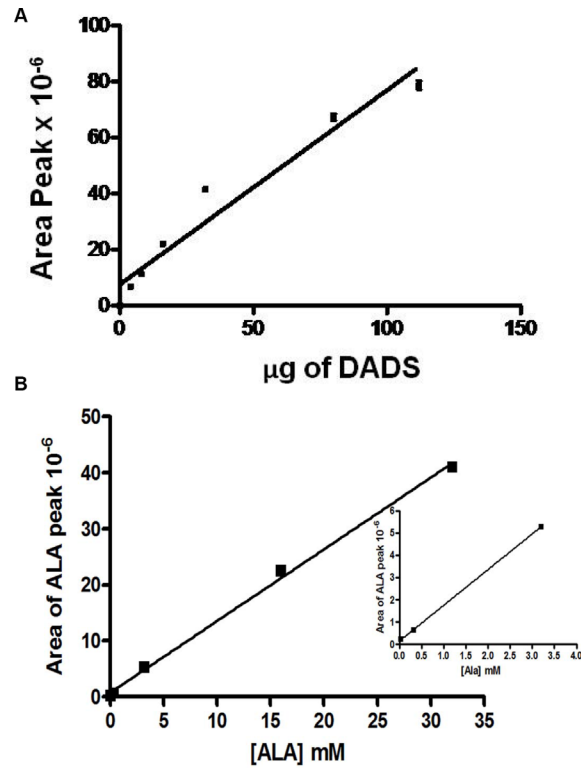

**Supplementary Figure S1: Calibration curves of DADS and ALA by RP-HPLC.** (A) Area of the characteristic peak of DADS is reported as function of the DADS concentration of the sample; (B) area of the characteristic peak of ALA is reported as function of the ALA concentration of the sample.

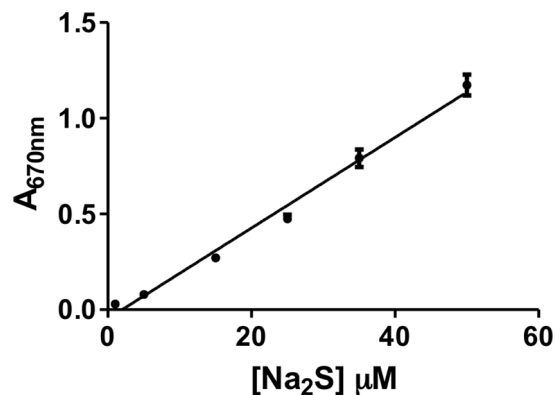

**Supplementary Figure S2: Calibration curves of H<sub>2</sub>S.** Calibration curve of H<sub>2</sub>S formation by methylene blue assay, obtained at different concentration of Na<sub>2</sub>S. Absorbance 670 nm. Each bar represents the ± SD of three experiments.

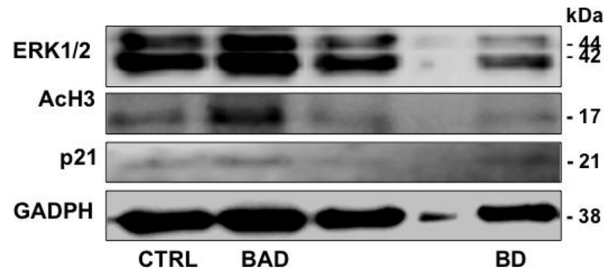

**Supplementary Figure S3: Figure 5b without the gray box.** Western blotting analysis of MCF 7 cell line after 24 h of treatment with BAD-NE, expression of ERK1/2, AcH3, p21 and GAPDH proteins.

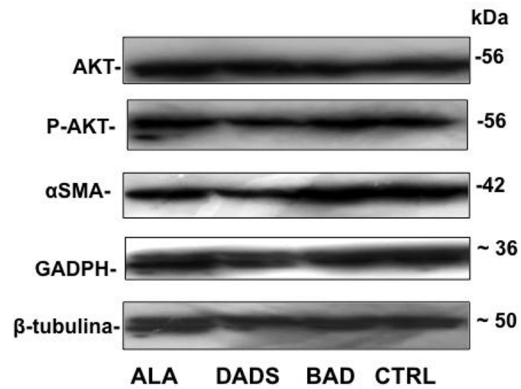

**Supplementary Figure S4: Full blot, as shown in Figure 10E, including the protein expression after ALA and DADS treatments.** Western blot analysis of Lin<sup>-</sup> Sca-1<sup>+</sup> hCPC line after 3 days in the presence of 50 μM of ALA, 50 μM of DADS, 50 μM of BAD-NE (BAD) and control the expression of Akt, P-Akt, α-sma and GAPDH and β-tubulin proteins.
